1 **Oral administration of an anti-CfaE secretory IgA antibody protects against**  
2 **Enterotoxigenic *Escherichia coli* diarrheal disease in a non-human primate model**

3 Matteo Stoppato<sup>a,c,\*</sup>, Carlos Gaspar<sup>b,\*</sup>, James Regeimbal<sup>a</sup>, Gladys Nunez<sup>a</sup>, Serena Giuntini<sup>a,d</sup>,  
4 Melissa A. Gawron<sup>a,e</sup>, Jessica R. Pondish<sup>a,f</sup>, Joseph C. Martin III<sup>a,e</sup>, Matthew Schneider<sup>a,g</sup>,  
5 Zachary A. Schiller<sup>a</sup>, Mark S. Klempner<sup>a,#</sup>, Lisa A. Cavacini<sup>a,#</sup>, Yang Wang<sup>a,#</sup>

6

7 Running Title: Oral anti-CfaE SIgA protects against ETEC

8 <sup>a</sup>MassBiologics of the University of Massachusetts Medical School, Boston, Massachusetts,  
9 USA

10 <sup>b</sup>Naval Medical Research Unit No. 6, Lima, Peru

11 \*Co-first authors

12

13 # Co-Corresponding Authors

14 Yang Wang, MD, PhD: MassBiologics of the University of Massachusetts Medical School; 460  
15 Walk Hill Street; Boston, MA 02126; [yang.wang@umassmed.edu](mailto:yang.wang@umassmed.edu);

16 Lisa Cavacini, PhD: MassBiologics of the University of Massachusetts Medical School; 460  
17 Walk Hill Street; Boston, MA 02126; [lisa.cavacini@umassmed.edu](mailto:lisa.cavacini@umassmed.edu);

18 Mark Klempner, MD: MassBiologics of the University of Massachusetts Medical School; 460  
19 Walk Hill Street; Boston, MA 02126; [mark.klempner@umassmed.edu](mailto:mark.klempner@umassmed.edu);

20

21 Present Address:

22 <sup>c</sup>Sana Biotechnology, Inc., Cambridge, Massachusetts, USA

23 <sup>d</sup>Staidson Biopharma, Richmond, California, USA

- 24 <sup>e</sup>Scholar Rock, Cambridge, Massachusetts, USA
- 25 <sup>f</sup>Morphic Therapeutics, Waltham, Massachusetts, USA
- 26 <sup>g</sup>Dragonfly Therapeutics, Waltham, Massachusetts, USA

27 **ABSTRACT**

28 Enterotoxigenic *Escherichia coli* (ETEC) is a leading cause of diarrhea-associated illness in  
29 developing countries. There is currently no vaccine licensed to prevent ETEC and the  
30 development of an efficacious prophylaxis would provide an intervention with significant  
31 impact. Recent studies suggested that effective protection could be achieved by inducing  
32 immunity to block colonization of ETEC. Here, we evaluated the efficacy of secretory (s) IgA2  
33 and dimeric (d) IgA2 of an anti-colonization factor antigen antibody, 68-61, in the *Aotus*  
34 *nancymaae* non-human primate (NHP) ETEC challenge model via oral and parental delivery.  
35 Thirty-nine animals were distributed across 3 groups of 13, and challenged with  $5.0 \times 10^{11}$  cfu of  
36 H10407 on Day 0. Group 1 received a dIgA2 68-61 subcutaneously on day 0. Group 2 received  
37 a sIgA2 68-61 orally on days -1, 0, and +1, and Group 3 received an irrelevant sIgA2 antibody  
38 orally on days -1, 0, and +1. All animals were observed for symptoms of diarrhea, and stools  
39 were collected for ETEC colony counts. sIgA2 treatment significantly lowered the attack rate,  
40 resulting in a protective efficacy of 71.4% ( $p=0.025$ ) in Group 2 as compared to Group 3. Anti-  
41 CfaE dIgA2 treatment group reduced the diarrheal attack rate, although the reduction did not  
42 reach significance (57.1%;  $P=0.072$ ) as compared to the irrelevant sIgA2 Group 3. Our results  
43 demonstrated the feasibility of oral administration of sIgA as a potential immunoprophylaxis  
44 against enteric infections. To our knowledge, this is the first study to demonstrate the efficacy of  
45 administrated sIgA in a non-human primate model.

46

47 **Key words:** ETEC diarrhea; sIgA; dIgA, non-human primates

48

## 49 INTRODUCTION

50 Enterotoxigenic *Escherichia coli* (ETEC) is the most common cause of diarrheal illness in  
51 infants in the developing world and in travelers to endemic countries. An estimated 10 million  
52 cases per year occur among travelers and military personnel deployed in endemic regions [1].  
53 ETEC is a non-invasive pathogen that mediates small intestine adherence through filamentous  
54 bacterial surface structures known as colonization factors (CF). Once bound to the small  
55 intestine, the bacteria produce toxins causing a net flow of water from enterocytes, leading to  
56 watery diarrhea [2, 3]. Previous approaches to prevent ETEC infection have targeted bacterial  
57 attachment and colonization. However, poor responses to vaccines and difficulties in the  
58 establishment of protective mucosal immunity against diverse types of CFs have hindered the  
59 licensing of ETEC vaccines.

60  
61 CFA/I is one of the most prevalent CFs expressed by pathogenic ETEC strains. CFA/I is  
62 composed of a stalk consisting of a long homopolymeric subunit and a minor adhesin subunit  
63 (CfaE) at the tip of the fimbria. Recent studies have demonstrated that the adhesin subunit can  
64 induce anti-adhesive immunity against ETEC infection [4, 5]. In human immunoprotection trials,  
65 oral administration of anti-CfaE bovine IgG provided protection in over 60% of the test group,  
66 suggesting that an adhesin-based vaccine could be effective to elicit endogenous production of  
67 protective antibodies [6].

68  
69 IgG and secretory IgA (SIgA) are both present in the small intestine as effector molecules of  
70 *mucosal* immune system. SIgA is considered to be one of the most important effector molecules  
71 because it constitutes the primary immune defense against pathogens at the mucosal surface [7].

72 In secretory IgA, two IgA monomers are covalently linked by a joining chain (J-chain), and  
73 stabilized by a polypeptide called the secretory component that make the molecule more resistant  
74 to digestion in the small intestine than IgG [8]. Early studies also have suggested that the  
75 secretory component may have its own antimicrobial activity to block epithelial adhesion of  
76 ETEC [9].

77

78 Our laboratory has recently identified a panel of anti-CfaE human monoclonal antibodies IgGs  
79 that could be employed as an immunoprophylaxis to prevent ETEC diarrhea [10]. We performed  
80 isotype switch to SIgAs and we are investigating the potential of these SIgAs to serve as  
81 immunoprophylaxis against ETEC diarrhea. Here, we evaluated the efficacy of one lead anti-  
82 CfaE SIgA, 68-61, in the *A. nancymaae* non-human primate ETEC challenge model (ETEC  
83 strain H10407) [11, 12]. In this model, *A. nancymaae* has been shown to be susceptible to  
84 diarrhea in response to experimental infection with ETEC expressing CFA/I, mimicking ETEC  
85 pathogenesis in human (Jones 2006). 68-61 was administered to *Aotus* either as a dimeric IgA2  
86 (dIgA2) via a single subcutaneous dose (SC) on the day of challenge (day 0) or as a secretory  
87 IgA2 (SIgA2) via oral delivery on days -1, 0 (challenge day), and +1. Animals were then  
88 monitored for diarrhea as previously described [12]. Our results demonstrate that oral  
89 administration of SIgA2 can protect animals from diarrhea associated with ETEC infection.

90

## 91 **RESULTS**

### 92 **Production and characterization of 68-61 SIgA2 and dIgA2 antibodies for NHP studies**

93 Large scale production for anti-CfaE 68-61 dIgA2 and SIgA2 antibodies were set up to generate  
94 sufficient material for NHP studies using an established IgA production platform in our

95 laboratory [10]. To verify the antibody quality, purified antibodies were analyzed by SDS-PAGE  
96 and western blots (Fig. 1A). MRHA and Caco-2 cell adhesion assays were also conducted to test  
97 the antibody in vitro functionalities. Similar to what was reported previously [10], both purified  
98 68-61 dIgA2 and SIgA2 showed functional activity in both hemagglutination assay (minimal  
99 inhibitory concentration of 0.04ug/ml and 0.08ug/ml) and Caco-2 adhesion assay (Fig. 1B and C,  
100 respectively).

101

### 102 **Antibody efficacy study in a non-human primate model challenged with ETEC**

103 Dimeric (Group 1) and secretory (Group 2) anti-CfaE IgA2 antibodies were administered to  
104 *Aotus nancymae* monkeys to determine their efficacy against ETEC H10407 strain. Animals  
105 administered the irrelevant control SIgA2 antibody (Group 3, oral) had a diarrheal attack rate of  
106 58% (7/12), within the range of the reported attack rate in this animal model [12]. Anti-CfaE  
107 dIgA2 treatment (Group 1; S.C.) lowered the attack rate to 23% (3/13), while SIgA2 treatment  
108 (Group 2; oral) significantly lowered the attack rate to 15% (2/13) as compared to Group 3. One  
109 animal in Group 3 was excluded from analysis due to the onset of diarrhea prior to challenge  
110 (Table 2). There was no significant difference in the colonization rate or the duration of shedding  
111 between the treatment groups. Based on the diarrheal attack rates, oral anti-CfaE SIgA2 (Group  
112 2) treatment resulted in a protective efficacy of 71.4% (P=0.025) compared to the irrelevant  
113 SIgA2 (Group 3). Treatment with a subcutaneous injection of anti-CfaE dIgA2 (Group 1)  
114 reduced the diarrheal attack rate, although the reduction did not reach significance (57.1%;  
115 P=0.072) as compared to Group 3 (Table 3). Of note, Group 1 animals did not receive any of the  
116 oral rehydration drink on days -1 and +1 that was used to orally administer the SIgA antibodies  
117 in Groups 2 and 3.

118

119

## 120 **DISCUSSION**

121 While both IgG and IgA are expressed at the mucosa, IgA is usually more effective on a molar  
122 basis and thus are the natural choice for mucosal passive immunization. The avidity of mucosal  
123 IgA, due to multimeric structure, enhances antibody binding with antigens and increases  
124 antibody mediated conformational or structural changes in the antigen. The diverse, high level  
125 of glycosylation of IgA antibodies, in comparison to IgG, further protects the mucosal surface by  
126 non-specific interference with microbial adherence. Here, we further explored the feasibility of  
127 administration of anti-CfaE IgA for protection against an ETEC challenge in the *A. nancymaae*  
128 non-human primate model. Oral delivery of an anti-CfaE SIgA2 resulted in 71.4% protective  
129 efficacy against ETEC diarrhea in animals.

130

131 The administration of a single dose of anti-CfaE dIgA antibody subcutaneously resulted in a  
132 57.1% reduction of ETEC diarrhea. Though not significant ( $P=0.072$ ), in contrast to the control  
133 animals (Group 3), Group 1 animals did not receive any of the oral rehydration drink, which may  
134 have imparted a small therapeutic effect to the control animals not recapitulated in Group 1.  
135 Eliminating this difference, dose optimization, and/or temporal administration experiments may  
136 reveal a significant reduction in diarrhea and further experimentation is clearly warranted.

137

138 Nevertheless, fecal shedding of H10407 was observed in all animals regardless of the treatment  
139 (Table 2). These results are consistent with observations in previous vaccine studies in animals  
140 and human challenge volunteers [12, 13], suggesting that the anti-ETEC immunity may inhibit

141 bacterial adherence and/or pathogenicity without affecting fecal shedding. Histological analysis  
142 in future experiments may verify the prevention of intestine colonization and better define the  
143 protective mechanism. Regardless, these results are promising and further definition of dose and  
144 temporal kinetics of SIgA oral administration should further increase efficacy.

145

146 IgA antibodies function in mucosal immunity as the first line of defense against pathogens  
147 making them attractive as candidate therapeutics [14]. However, efficacy studies of passively  
148 administered IgA in animal models has been limited by the capabilities of large-scale production  
149 in the laboratory. In this study, we were able to utilize our recently developed IgA production  
150 methods [10] to generate high quality dIgA and SIgA to support a well-powered non-human  
151 primate animal study. Through our study, we established the feasibility of oral administration of  
152 SIgA2 as a potent immunoprophylaxis against enteric infections. We further demonstrate the  
153 potential feasibility of subcutaneous administered dIgA2 in preventing ETEC diarrhea. These  
154 results are of great interest as they demonstrate for the first time that SIgA2 can be used as a  
155 preventative against bacterial diarrhea.

156



## 157 **MATERIALS AND METHODS**

### 158 **68-61 SIgA and dIgA antibody production and characterization**

159 68-61 dIgA2 and SIgA2 antibodies were produced and characterized as previously described  
160 [10]. To generate dIgA2, the heavy and light chain vectors were co-transfected with a J chain  
161 expressing vector with equal molar ratio in CHO cells. For SIgA2, a secretory component  
162 expressing vector was added to the dIgA2 transfection reaction (equal molar ratio for all  
163 vectors). Supernatant was run through a column of Capture Select IgA (ThermoFisher) or  
164 CptoL resin (GE Life Sciences) for dIgA and SIgA respectively, followed by size exclusion  
165 chromatography (HiLoad 26/600 Superdex 200 pg size exclusion column; GE Life Sciences) to  
166 separate out the desired dimeric or secretory antibodies. Desired fractions were pooled,  
167 concentrated and quality tested by SDS-PAGE, western blots and through mannose-resistant  
168 hemagglutination (MRHA) and Caco-2 cell adhesion assays.

169

### 170 **Mannose resistant hemagglutination assay of human group A erythrocytes**

171 ETEC cultures were taken from frozen cell banks and diluted in sterile 0.15 M saline solution  
172 until reaching an OD<sub>600nm</sub> of 1 for the assay. Human erythrocytes type A+ stored in K3EDTA  
173 were washed three times with 0.15 M saline solution and resuspended in the same solution to a  
174 final concentration of 1.5% (vol/vol). In a U-bottom 96-well plate (Nunc Thermo Scientific) 100  
175 µl of IgA antibodies were added in duplicate to the top row and diluted 1:2 down the plate in  
176 0.15 M saline solution. 50 µl of appropriately diluted ETEC was added to each well together  
177 with 50 µl of 0.1 M D-mannose solution (sigma). The plate was incubated for 10 minutes at  
178 room temperature. After incubation, 50 µl of blood solution was added to the plate and mixed  
179 well (200 µl final volume). Plates were allowed to sit stagnant at 4°C for two hours.

180 Hemagglutination was then observed without the aid of magnification. The absence of a pellet of  
181 red blood cells at the bottom of the well is indicative of positive hemagglutination. Blood was  
182 ordered fresh every week (BioreclamationIVT).

183

#### 184 **Caco-2 adhesion assay**

185 Caco-2 cells seeded at  $1 \times 10^5$  cells/mL were grown in 24-well tissue culture plates containing  
186 Dulbecco's modified Eagle's medium (DMEM), at 37°C in 5% CO<sub>2</sub> static. Frozen bacterial banks  
187 were streaked on CFA agar plates and grown overnight at 37°C. The next day, bacteria were  
188 resuspended in PBS and diluted until reaching an OD<sub>600nm</sub> of 0.1. Antibody dilutions were set up  
189 in a deep well plate. Antibody dilutions and bacteria were combined in a 1:10 ratio and allowed  
190 to shake at 300 rpm for one hour at room temperature. After incubation, 0.2 mL of  
191 antibody/bacteria mixture was added to each well containing Caco-2 cells. The cells were then  
192 incubated statically for 3 hours at 37°C. Cells were then washed four times with 1 mL PBS to  
193 remove non-adherent ETEC cells. Afterwards, Caco-2 cells were dislodged with 0.2 mL 0.25%  
194 trypsin. Cells were collected via gentle centrifugation and resuspended in 1mL PBS. Dilutions  
195 were plated on CFA agar plates and colonies counted the next day. IC<sub>50</sub> was defined as  
196 concentration of antibody needed to inhibit 50% of ETEC adhesion to the Caco-2 cells,  
197 compared to an irrelevant isotype antibody.

198

#### 199 **Ethics statement**

200 The non-human primate (NHP) research was conducted in an AAALAC-accredited Laboratory  
201 Animal Facility, in compliance with the Animal Welfare Act and in accordance with principles  
202 set forth in the "Guide for the Care and Use of Laboratory Animals," Institute of Laboratory

203 Animals Resources, National Research Council, National Academy Press, 1996, and other U.S.  
204 Federal Government statutes. Local approval was by the U.S. Naval Medical Research Unit No  
205 6 (NAMRU-6) Institutional Animal Care and Use Committee (IACUC), second-level approval  
206 from the U.S. Navy Bureau of Medicine and Surgery, and the study was approved via  
207 Resolucion Directoral No. 0452-2017 SERFOR-DGGSPFFS by the Forestry and Wild Fauna  
208 Service, Peruvian Ministry of Agriculture

209  
210 The *A. nancymae* used in this study were purchased from the Instituto Veterinario de  
211 Investigaciones Tropicales y de Altura (IVITA), University of San Marcos, Lima, Peru, and  
212 shipped to NAMRU-6 in Lima, Peru. Animals were maintained in pairs when not required to be  
213 individually housed for sample collection, fed a standard monkey diet supplemented with fruit  
214 and provided water *ad libitum*. Following the study, antibiotic treated and ETEC-free animals  
215 were returned to the IVITA colony.

216  
217 **Administration of antibody and ETEC challenge inoculums**

218 The ETEC challenge model has been previously described [10, 12]. Briefly, *A. nancymae*  
219 monkeys were screened by enzyme-linked immunosorbent assay (ELISA). Animals deemed  
220 seropositive were excluded from the study. The remaining thirty-nine animals were distributed  
221 across three groups of 13 according to age, sex, and weight. Following a 21 day acclimation  
222 period, the animals were fasted overnight and on study day 0 all animals were anesthetized with  
223 ketamine hydrochloride (10mg/kg weight, Ketalar, Parke-Davis) and an orogastric feeding tube  
224 was placed (5Fr/Ch, 1.7 mm X 41 cm). All animals also received ranitidine (1.5 mg/kg) by  
225 intramuscular injection 90 minutes prior to challenge to inhibit gastric acid production, and 5 ml

226 CeraVacxII (CeraProducts, Jessup, MD) was given 30 minutes prior to challenge to neutralize  
227 stomach pH. All animals were then challenged with  $5 \times 10^{11}$  cfu ETEC CFA/I+H10407 (5 ml  
228 volume).

229 All groups received an antibody treatment (9 mg/kg) prior to challenge on Day 0. Group 1  
230 received an anti-CfaE dIgA2 antibody by subcutaneous (S.C.) injection. Group 2 received an  
231 anti-CfaE SIgA2 antibody via the orogastric line. Group 3 received a control SIgA2 antibody  
232 against an HIV target (no cross-reactivity with H10407 in vitro, data not shown) via the  
233 orogastric line. Group 2 and Group 3 also received antibody treatment one day prior to challenge  
234 (day -1) and one day post challenge (day +1). These additional treatments (9 mg/kg) were  
235 prepared by diluting the antibody (anti-CfaE SIgA2 for Group 2 and control SIgA2 for Group 3)  
236 into 5 mL total volume of Prang oral rehydration drink (Bio-Serv; orange flavor), and the diluted  
237 antibody was then administered orally by syringe via voluntary consumption. All animals were  
238 observed for 10 days and then treated with Enrofloxacin until ETEC H10407 was not detected in  
239 stool samples. The Study design of the challenge model is illustrated in Figure 1. The  
240 demographic variables of animals in each individual group is listed in Table 1.

241

#### 242 **Observation after passive immunoprophylaxis and challenge**

243 Animals were observed twice daily for signs and symptoms of diarrhea starting on study day -3  
244 and continuing for 10 days after challenge. Stools were graded as follows: grade 1 (formed, firm  
245 stool pellets), grade 2 (formed but soft stool pellets or droppings), grade 3 (loose, unformed  
246 feces), grade 4 (watery, non-clear feces), and grade 5 (watery, clear liquid stools). Stools graded  
247 1 or 2 were considered normal, whereas stools graded 3, 4, or 5 were considered abnormal. The  
248 case definition of a diarrhea episode was defined as the passing of grade 3 or higher stools for at

249 least two consecutive days during the observation period. The duration of diarrhea was defined  
250 as the time between the first day of a diarrhea episode and the last day of diarrhea preceding two  
251 consecutive diarrhea-free days. Animals meeting the case definition of diarrhea prior to the  
252 challenge were excluded from data analysis.

253

254 Fecal cultures for H10407 ETEC were performed daily for 10 days after challenge by streaking  
255 fresh stool and plating serial dilutions of stool directly onto MacConkey agar. Presumptive  
256 H10407 isolates (lactose-positive) were confirmed by colony blot using rabbit antisera against  
257 CFA/I. Stool was considered negative for H10407 if no lactose positive *E. coli* colonies were  
258 isolated, or if 10 presumptive colonies were negative by immunoblot. A period of fecal shedding  
259 was defined as isolation of H10407 (CFA/I positive colonies) from stool collected after  
260 challenge, beginning (onset) as early as the first day after challenge, and ending (duration) on the  
261 last day that H10407 is detectable in stool, up to day 10 post challenge.

262

### 263 **Statistical analyses**

264 Intergroup comparison of clinical outcomes were performed using nonparametric tests for  
265 continuous outcomes (Kruskal-Wallis test for comparing the values for more than two groups)  
266 and Fisher's exact test for nominal outcomes. All statistical tests were interpreted in a two-tailed  
267 fashion with acceptance of significance set at the  $P < 0.05$  level.

268

269

## 270 **ACKNOWLEDGMENTS**

271 The authors declare that there are no financial, institutional or other relationships that might lead  
272 to bias or a conflict of interest. The views expressed in this article are those of the authors and  
273 do not necessarily reflect the official policy or position of the Department of the Navy,  
274 Department of Defense, nor the U.S. Government.

275

276 This work was supported by the Defense Advanced Research Project Agency (DARPA-BAA-  
277 13-03) to MK.

278

279 Some of the authors are military service members or employees of the U.S. Government. This  
280 work was prepared as part of their official duties. Title 17 U.S.C. § 105 provides that ‘Copyright  
281 protection under this title is not available for any work of the United States Government’. Title  
282 17 U.S.C. § 101 defines a U.S. Government work as a work prepared by a military service  
283 member or employee of the U.S. Government as part of that person’s official duties.

284 We would like to thank the veterinary staff of Naval Medical Research Unit 6 for their technical  
285 support, LTC Robin Burke for input regarding health and safety parameters, Ms. Nereyda  
286 Espinoza, Ms. Monica Nieto, Mr. Jesús Rojas and Ms. Rosa Castillo for their excellent technical  
287 assistance during this study.

288 **REFERENCES**

- 289 [1] W. Zhang, D.A. Sack, Progress and hurdles in the development of vaccines against  
290 enterotoxigenic *Escherichia coli* in humans, *Expert Rev Vaccines* 11(6) (2012) 677-94.
- 291 [2] T.P. Madhavan, H. Sakellaris, Colonization factors of enterotoxigenic *Escherichia coli*, *Adv*  
292 *Appl Microbiol* 90 (2015) 155-97.
- 293 [3] C.L. Sears, J.B. Kaper, Enteric bacterial toxins: mechanisms of action and linkage to  
294 intestinal secretion, *Microbiol Rev* 60(1) (1996) 167-215.
- 295 [4] W.B. Luiz, J.F. Rodrigues, J.H. Crabb, S.J. Savarino, L.C. Ferreira, Maternal vaccination  
296 with a fimbrial tip adhesin and passive protection of neonatal mice against lethal human  
297 enterotoxigenic *Escherichia coli* challenge, *Infect Immun* 83(12) (2015) 4555-64.
- 298 [5] S.J. Savarino, R. McKenzie, D.R. Tribble, C.K. Porter, A. O'Dowd, J.A. Cantrell, S.A.  
299 Sincock, S.T. Poole, B. DeNearing, C.M. Woods, H. Kim, S.L. Grahek, C. Brinkley, J.H. Crabb,  
300 A.L. Bourgeois, Prophylactic Efficacy of Hyperimmune Bovine Colostral Antiadhesin  
301 Antibodies Against Enterotoxigenic *Escherichia coli* Diarrhea: A Randomized, Double-Blind,  
302 Placebo-Controlled, Phase 1 Trial, *J Infect Dis* (2017).
- 303 [6] S.J. Savarino, R. McKenzie, D.R. Tribble, C.K. Porter, A. O'Dowd, J.A. Cantrell, S.A.  
304 Sincock, S.T. Poole, B. DeNearing, C.M. Woods, H. Kim, S.L. Grahek, C. Brinkley, J.H. Crabb,  
305 A.L. Bourgeois, Prophylactic Efficacy of Hyperimmune Bovine Colostral Antiadhesin  
306 Antibodies Against Enterotoxigenic *Escherichia coli* Diarrhea: A Randomized, Double-Blind,  
307 Placebo-Controlled, Phase 1 Trial, *J Infect Dis* 216(1) (2017) 7-13.
- 308 [7] P. Brandtzaeg, Induction of secretory immunity and memory at mucosal surfaces, *Vaccine*  
309 25(30) (2007) 5467-84.

- 310 [8] K. Stelwagen, E. Carpenter, B. Haigh, A. Hodgkinson, T.T. Wheeler, Immune components of  
311 bovine colostrum and milk, *J Anim Sci* 87(13 Suppl) (2009) 3-9.
- 312 [9] P. Brandtzaeg, Mucosal immunity: integration between mother and the breast-fed infant,  
313 *Vaccine* 21(24) (2003) 3382-3388.
- 314 [10] S. Giuntini, M. Stoppato, M. Sedic, M. Ejemel, J.R. Pondish, D. Wisheart, Z.A. Schiller,  
315 W.D. Thomas, Jr., E.M. Barry, L.A. Cavacini, M.S. Klempner, Y. Wang, Identification and  
316 Characterization of Human Monoclonal Antibodies for Immunoprophylaxis Against  
317 Enterotoxigenic *Escherichia coli* Infection, *Infect Immun* (2018).
- 318 [11] H. Wenzel, R.W. Kaminski, K.A. Clarkson, M. Maciel, Jr., M.A. Smith, W. Zhang, E.V.  
319 Oaks, Improving chances for successful clinical outcomes with better preclinical models,  
320 *Vaccine* 35(49 Pt A) (2017) 6798-6802.
- 321 [12] J.E. Rollenhagen, F. Jones, E. Hall, R. Maves, G. Nunez, N. Espinosa, A. O'Dowd, M.G.  
322 Prouty, S.J. Savarino, Establishment, validation and application of a New World Primate model  
323 of ETEC disease for vaccine development, *Infect Immun* (2018).
- 324 [13] S.D. Isidean, M.S. Riddle, S.J. Savarino, C.K. Porter, A systematic review of ETEC  
325 epidemiology focusing on colonization factor and toxin expression, *Vaccine* 29(37) (2011) 6167-  
326 78.
- 327 [14] J.M. Woof, M.W. Russell, Structure and function relationships in IgA, *Mucosal Immunol*  
328 4(6) (2011) 590-7.
- 329



330 **Figure Legend:**

331 Figure 1: Study design of the challenge experiment. FO = fecal observation and scoring, all  
332 animals; F = fecal collection, all animals; C = challenge; O = oral antibody administration; Q=  
333 SubQ antibody administration.

334

335 Figure 2: Characterization of 68-61 dimeric and secretory IgA. A) SDS-PAGE and Western blot  
336 of 68-61 dIgA (line 2) and 68-61 SIgA (line 3). Antibody specific to secretory component and  
337 SIgA was used for western blot. B) Activity of 68-61 dIgA2 and SIgA2 in a mannose resistant  
338 hemagglutination assay of human group A erythrocytes. The minimal inhibitory concentration to  
339 prevent hemagglutination is 0.04 and 0.08  $\mu\text{g/ml}$  for dIgA2 and SIgA2 respectively. The assay  
340 was repeated three times using different blood donors. C) Functionality of 68-61 dIgA2 and  
341 SIgA2 tested in a representative Caco-2 adhesion assay

**Table 1.** Demographic variable and study design

| Group | Treatment       | N° of Animals   | N° males/<br>females | Mean age,<br>Months<br>(SD) | Mean<br>weight,<br>grams (SD) | Study Design |            |                                  |                     |                  |
|-------|-----------------|-----------------|----------------------|-----------------------------|-------------------------------|--------------|------------|----------------------------------|---------------------|------------------|
|       |                 |                 |                      |                             |                               | Route        | Dose       | Time Points of<br>Administration | Challenge<br>Strain | Challenge<br>Day |
| 1     | dIgA2 anti-CfaE | 13              | 6/7                  | 16.1 (1.38)                 | 853.5<br>(111.5)              | Sub-Q        | 9<br>mg/Kg | SD 0                             | H10407              | SD 0             |
| 2     | sIgA2 anti-CfaE | 13              | 7/6                  | 15.9 (1.32)                 | 819 (42.6)                    | Oral-OG      | 9<br>mg/Kg | SD -1, 0, 1                      | H10407              | SD 0             |
| 3     | Control IgA2    | 12 <sup>a</sup> | 7/6                  | 16.1 (1.28)                 | 812.5 (72.3)                  | Oral-OG      | 9<br>mg/Kg | SD -1, 0, 1                      | H10407              | SD 0             |

<sup>a</sup>One animal excluded from data analysis due to diarrhea for 3 days prior to challenge.

**Table 2.** Diarrhea and colonization after oral challenge of *A. nancymaae* with ETEC strain H10407

| Treatment       | N° of Animals   | Diarrhea <sup>a</sup> |               |                                  | Fecal Shedding <sup>b</sup>        |               |                                  |                                     |
|-----------------|-----------------|-----------------------|---------------|----------------------------------|------------------------------------|---------------|----------------------------------|-------------------------------------|
|                 |                 | N° of Cases           | Incidence (%) | Mean N° of days to onset (range) | Mean N° of days to illness (range) | Incidence (%) | Mean N° of days to onset (range) | Mean N° of days of duration (range) |
| dIgA2 anti-CfaE | 13              | 6/7                   | 16.1 (1.38)   | 853.5 (111.5)                    | Sub-Q                              | 9 mg/Kg       | SD 0                             | H10407                              |
| sIgA2 anti-CfaE | 13              | 7/6                   | 15.9 (1.32)   | 819 (42.6)                       | Oral-OG                            | 9 mg/Kg       | SD -1, 0, 1                      | H10407                              |
| Control IgA2    | 12 <sup>c</sup> | 7/6                   | 16.1 (1.28)   | 812.5 (72.3)                     | Oral-OG                            | 9 mg/Kg       | SD -1, 0, 1                      | H10407                              |

<sup>a</sup>Diarrhea defined as at least one loose-watery stool on at least two consecutive days during the observation period (10 days) postchallenge

<sup>b</sup>Fecal shedding assessed by plating on MacConkey agar with confirmatory colony blotting.

<sup>c</sup>One animal excluded from data analysis due to diarrhea for 3 days prior to challenge

**Table 3.** Protective Efficacy in *A. nancymaae*

| Group | Vaccine                  | N° with diarrhea/N (%) | Protective Efficacy (%) | <i>P</i> value <sup>a</sup> |
|-------|--------------------------|------------------------|-------------------------|-----------------------------|
| 1     | Dimeric anti-CfaE IgA2   | 3/13 (23)              | 57.1                    | 0.072                       |
| 2     | Secretory anti-CfaE IgA2 | 2/13 (15)              | 71.4                    | 0.025                       |
| 3     | Control IgA2             | 7/12 (58)              | -                       | -                           |

<sup>a</sup>Fisher Exact Test, two-tailed, comparing frequency of diarrhea test groups to control group.

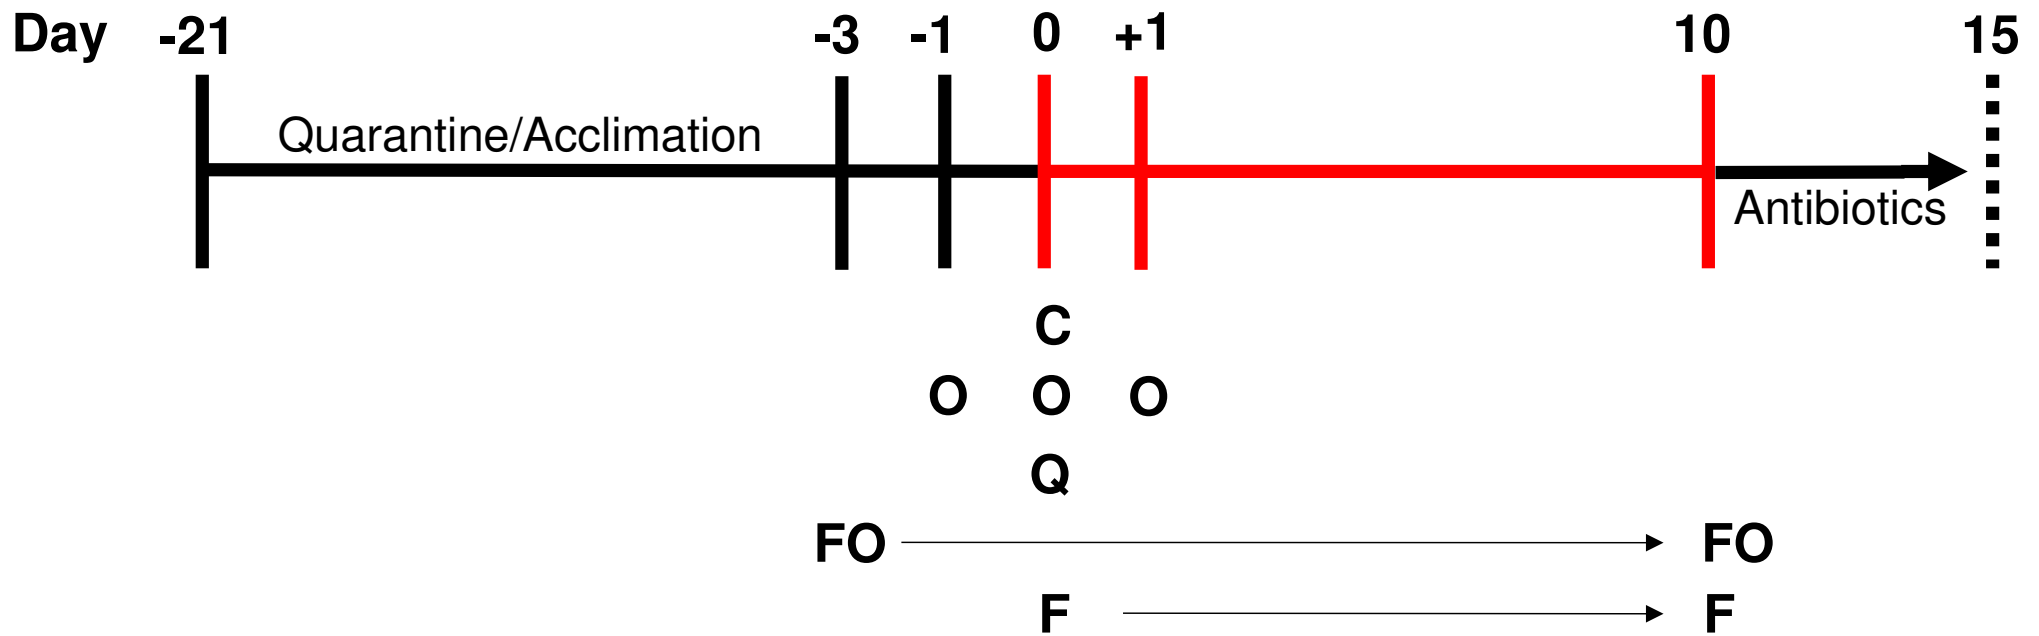

Figure 1: Study design of the challenge experiment. FO = fecal observation and scoring, all animals; F = fecal collection, all animals; C = challenge; O = oral antibody administration; Q= SubQ antibody administration.

## Panel A

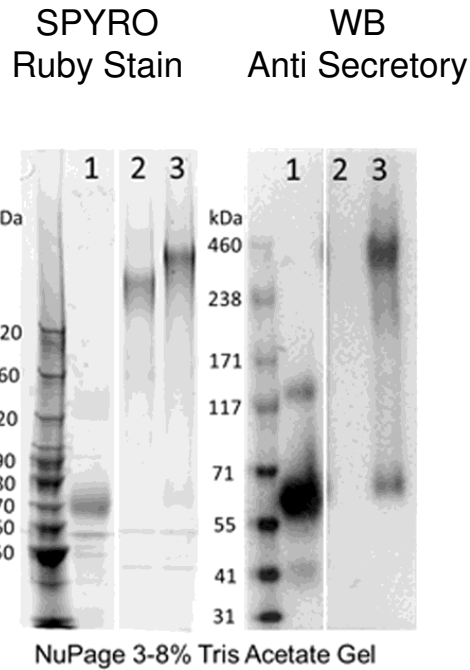

Line:

1. Secretory Component Control
2. 68-61 dIgA2
3. 68-61 sIgA2

## Panel B

Hemagglutination assay

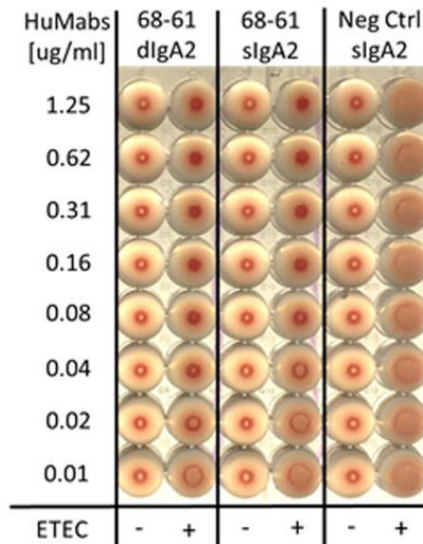

## Panel C

Caco-2 adhesion assay

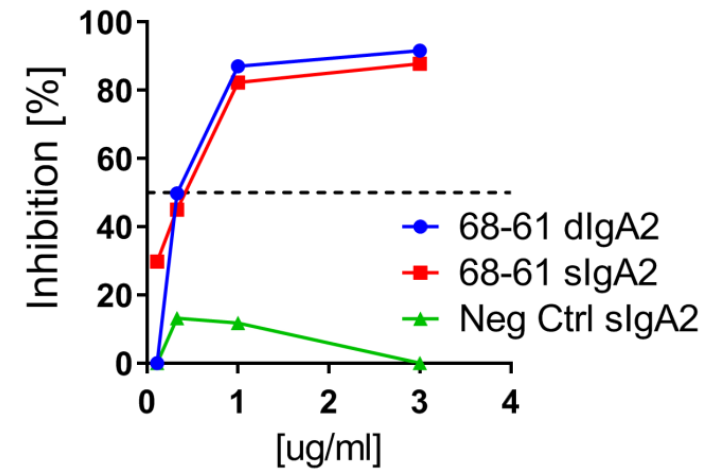

Figure 2: Characterization of 68-61 dimeric and secretory IgA. A) SDS-PAGE and Western blot of 68-61 dIgA (line 2) and 68-61 sIgA (line 3). Antibody specific to secretory component and sIgA was used for western blot. B) Activity of 68-61 dIgA2 and sIgA2 in a mannose resistant hemagglutination assay of human group A erythrocytes. The minimal inhibitory concentration to prevent hemagglutination is 0.04 and 0.08  $\mu\text{g/ml}$  for dIgA2 and sIgA2 respectively. The assay was repeated three times using different blood donors. C) Functionality of 68-61 dIgA2 and sIgA2 tested in a representative Caco-2 adhesion assay
